# Supplementary material for: Critical assessment of the exsolution process in Cu-doped SrTiO3 by a combined spectroscopic approach
Source: Royal Society of Chemistry journal article supplement (doi:10.1039/d4qi02391a), 2024-11-22
Supplement: d4qi02391a1.pdf [file d4qi02391a1.pdf]

## Supporting information

### **Critical assessment of exsolution process in Cu-doped SrTiO<sub>3</sub> by a combined spectroscopic approach.**

Pietro Mariani<sup>a</sup>, Xiao Sun<sup>b,c</sup>, Simone Mascotto<sup>c\*</sup>, Luisa Raimondo<sup>a</sup>, Adele Sassella<sup>a</sup>, Damiano Monticelli<sup>d</sup>, Enrico Berretti<sup>e</sup>, Alessandro Lavacchi<sup>e</sup>, Matus Stredansky<sup>f</sup>, Cinzia Cepek<sup>f</sup>, Silvia Mostoni<sup>a</sup>, Carlo Santoro<sup>a</sup>, Barbara Di Credico<sup>a</sup>, Roberto Scotti<sup>a</sup> and Massimiliano D'Arienzo<sup>a\*</sup>

<sup>a</sup> University of Milano-Bicocca, Dept. of Materials Science, INSTM, Via R. Cozzi 55, 20125 Milano, Italy.

<sup>b</sup> Deutsches Elektronen-Synchrotron DESY, Notkestr. 85, 22607 Hamburg, Germany

<sup>c</sup> Institut für Integrierte Naturwissenschaften, Universität Koblenz, Germany

<sup>d</sup> University of Insubria, Dept. of Science and High Technology, Via Valleggio 11, Como, Italy

<sup>e</sup> Institute of Chemistry of the Organometallic Compounds - National Research Council (ICCOM-CNR), Via Madonna del Piano, 10, 50019 Sesto Fiorentino (FI), Italy

<sup>f</sup> Istituto Officina dei Materiali-CNR Laboratorio TASC, Strada Statale 14, km 163.4, I-34012, Trieste, Italy

\* Corresponding authors e-mails: [mascotto@uni-koblenz.de](mailto:mascotto@uni-koblenz.de); [massimiliano.dariento@unimib.it](mailto:massimiliano.dariento@unimib.it)

## ICP-OES characterization

**Table S1:** ICP results

| Sample  | Cu ICP counts | Nominal absolute Cu content (% m/m) | Measured Cu content (%m/m) |
|---------|---------------|-------------------------------------|----------------------------|
| Blank   | 0.07305       | n.a.                                | 0.1                        |
| 5Cu-STO | 0.94823       | 1.76                                | 1.5                        |
| STO     | 0.07064       | 0                                   | 0.1                        |

## XRD characterization

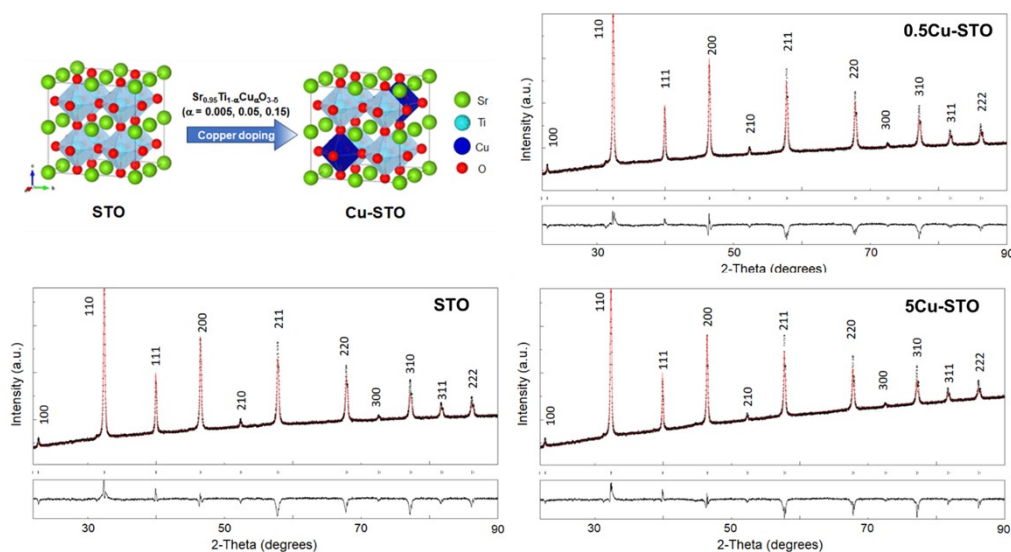

**Figure S1:** XRD patterns and corresponding fitting of STO, 0.5Cu-STO, 5Cu-STO.

## XAS characterization

**Table S2:** Coordination number and bond length for 0.5Cu-STO and 5Cu-STO as prepared, after

| Sample       | Cu-O (Cu <sub>2</sub> O) |                  |         |                | Cu-O (CuO)      |                  |         |                |
|--------------|--------------------------|------------------|---------|----------------|-----------------|------------------|---------|----------------|
|              | Bond length [Å]          | Coordination Nr. | ΔE [eV] | σ <sup>2</sup> | Bond length [Å] | Coordination Nr. | ΔE [eV] | σ <sup>2</sup> |
| 0.5Cu-STO    | 1.59(0)                  | 4.00(0)          | 2.5     | 0.12735        | 1.98(0)         | 2.17(1)          | 2.5     | 0.0004         |
| 0.5Cu-STO_r  | 1.60(1)                  | 4.00(0)          | 2.5     | 0.08985        | 1.99(0)         | 1.61(5)          | 2.5     | 0.0003         |
| 0.5Cu-STO_ox | 1.57(1)                  | 3.66(34)         | 2.5     | 0.07891        | 1.99(0)         | 1.48(9)          | 2.5     | 0.0001         |
| 5Cu-STO      | 1.95(1)                  | 3.14(15)         | 2.5     | 0.00229        | 2.25(2)         | 2.07(13)         | 2.5     | 0.004          |
| 5Cu-STO_r    | 1.95(1)                  | 2.43(30)         | 2.5     | 0.00208        | 2.24(5)         | 1.23(05)         | 2.5     | 0.003          |
| 5Cu-STO_ox   | 1.94(1)                  | 2.99(24)         | 2.5     | 0.00120        | 2.21(3)         | 1.86(91)         | 2.5     | 0.003          |

reduction and after reoxidation, fitted from EXAFS data.

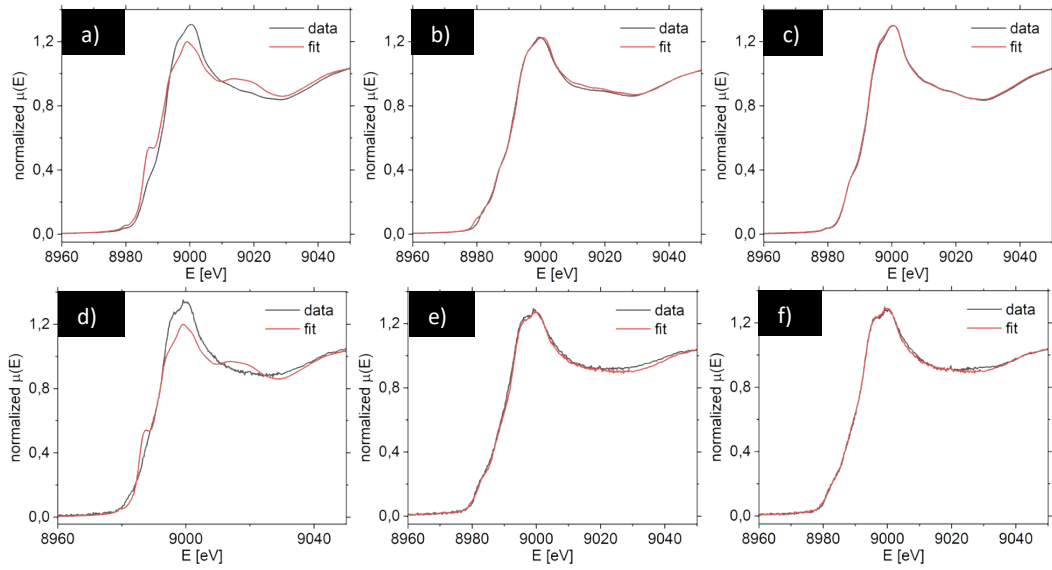

**Figure S2:** XANES spectra and fitting of a) 5Cu-STO, b) 5Cu-STO\_r, c) 5Cu-STO\_ox, d) 0.5Cu-STO, e) 0.5Cu-STO\_r, f) 0.5Cu-STO\_ox,

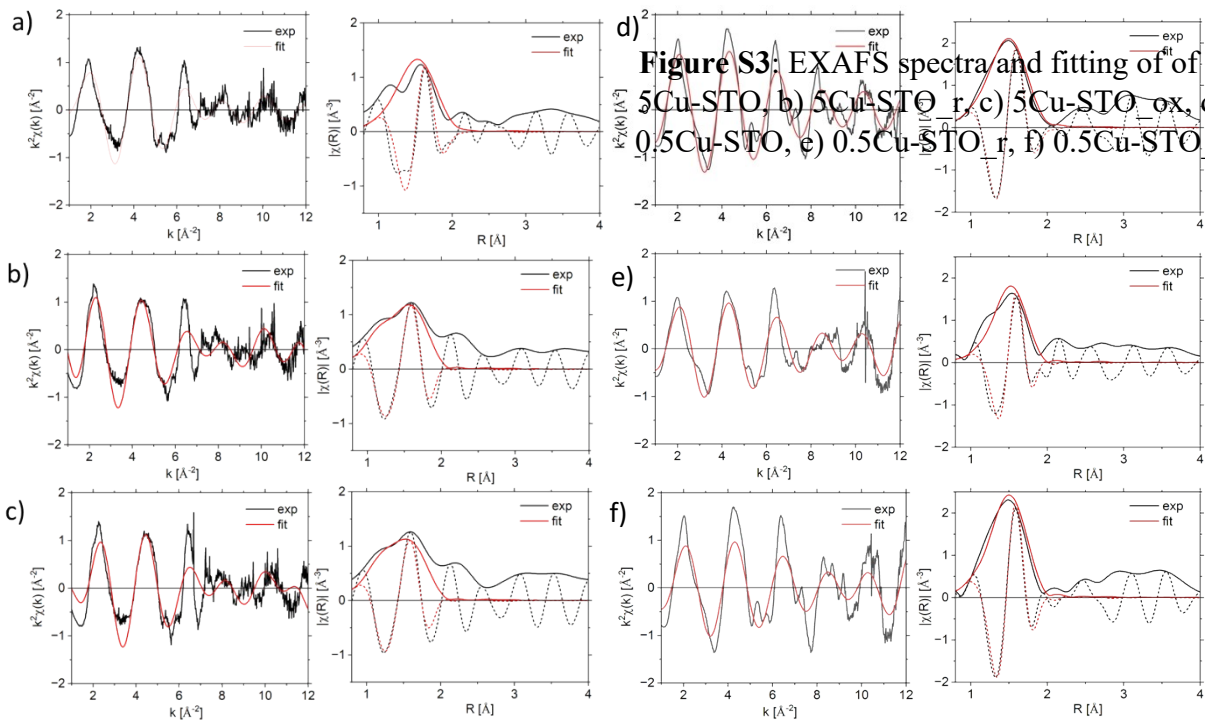

**Figure S3:** EXAFS spectra and fitting of a) 5Cu-STO, b) 5Cu-STO\_r, c) 5Cu-STO\_ox, d) 0.5Cu-STO, e) 0.5Cu-STO\_r, f) 0.5Cu-STO\_ox.

## XPS characterization

The Sr 3*d* levels were fitted keeping constant the branching ratio (0.66±0.1), spin-orbit splitting (1.75 eV, Sr 3*d*<sub>3/2</sub> at 132.7 eV) and gamma (0.28 eV), while the peak's intensity and FWHM were free parameters.

| <b>Sr 3<i>d</i></b> |       |       |                                 |                                 |                                   |                                   |                                    |                                    |
|---------------------|-------|-------|---------------------------------|---------------------------------|-----------------------------------|-----------------------------------|------------------------------------|------------------------------------|
|                     | STO   | STO_r | 5Cu-STO<br>1 <sup>st</sup> comp | 5Cu-STO<br>2 <sup>nd</sup> comp | 5Cu-STO_r<br>1 <sup>st</sup> comp | 5Cu-STO_r<br>2 <sup>nd</sup> comp | 5Cu-STO_ox<br>1 <sup>st</sup> comp | 5Cu-STO_ox<br>2 <sup>nd</sup> comp |
| Position            | 132.7 | 132.7 | 132.7                           | 131.1                           | 132.7                             | 131.1                             | 132.7                              | 131.1                              |
| gamma               | 0.28  | 0.28  | 0.28                            | 0.28                            | 0.28                              | 0.28                              | 0.28                               | 0.28                               |
| FWHM                | 1.3   | 1.8   | 1.36                            | 1.36                            | 1.36                              | 1.63                              | 1.36                               | 1.36                               |
| Branching ratio     | 0.72  | 0.72  | 0.72                            | 0.72                            | 0.72                              | 0.72                              | 0.72                               | 0.72                               |
| Energy splitting    | 1.75  | 1.75  | 1.75                            | 1.75                            | 1.75                              | 1.75                              | 1.75                               | 1.75                               |

The Ti 2*p* level was fitted using one doublet, keeping constant the branching ratio, spin-orbit splitting (5.7 eV) and gamma (for the 2*p*<sub>3/2</sub> 0.25 eV and 2*p*<sub>1/2</sub> 0.52 eV), while the intensity and FWHM were free fitting parameters.

| <b>Ti 2<i>p</i></b> |             |             |                                 |                                 |                                   |                                   |                                    |                                    |
|---------------------|-------------|-------------|---------------------------------|---------------------------------|-----------------------------------|-----------------------------------|------------------------------------|------------------------------------|
|                     | STO         | STO_r       | 5Cu-STO<br>1 <sup>st</sup> comp | 5Cu-STO<br>2 <sup>nd</sup> comp | 5Cu-STO_r<br>1 <sup>st</sup> comp | 5Cu-STO_r<br>2 <sup>nd</sup> comp | 5Cu-STO_ox<br>1 <sup>st</sup> comp | 5Cu-STO_ox<br>2 <sup>nd</sup> comp |
| Position            | 453.8       | 453.8       | 453.8                           | 456.9                           | 453.8                             | 456.9                             | 453.8                              | 456.9                              |
| gamma               | 0.25 - 0.52 | 0.25 - 0.52 | 0.25 - 0.52                     | 0.25 - 0.52                     | 0.25 - 0.52                       | 0.25 - 0.52                       | 0.25 - 0.52                        | 0.25 - 0.52                        |
| FWHM                | 1.3         | 1.6         | 1.45                            | 1.65                            | 1.45                              | 1.65                              | 1.45                               | 1.65                               |
| Branching ratio     | 0.51        | 0.51        | 0.51                            | 0.51                            | 0.51                              | 0.51                              | 0.51                               | 0.51                               |
| Energy splitting    | 5.67        | 5.67        | 5.67                            | 5.67                            | 5.67                              | 5.67                              | 5.67                               | 5.67                               |

The Cu 2*p*<sub>3/2</sub> of the 5Cu-STO and 5Cu-STO\_ox samples were fitted using two main components, one located at 933.3 eV (gamma 0.61 eV, FWHM of 1.8 eV), the other at 934.9 eV (gamma 0.61 eV and FWHM of 2.3 eV). A further component at 944.0 (5Cu-STO) or at 943.8 eV (5Cu-STO\_ox) was used to reproduce the satellite peaks. The Cu 2*p*<sub>3/2</sub> of the reduced 5Cu-STO\_r was fitted using one single component at 932.2 eV (gamma 0.61 eV and FWHM of 2.3 eV).

| <b>Cu 2<i>p</i><sub>3/2</sub></b> |                                 |                                 |                                 |                                    |                                    |                                   |           |
|-----------------------------------|---------------------------------|---------------------------------|---------------------------------|------------------------------------|------------------------------------|-----------------------------------|-----------|
|                                   | 5Cu-STO 1 <sup>st</sup><br>comp | 5Cu-STO 2 <sup>nd</sup><br>comp | 5Cu-STO 3 <sup>rd</sup><br>comp | 5Cu-STO_ox 1 <sup>st</sup><br>comp | 5Cu-STO_ox 2 <sup>nd</sup><br>comp | 5Cu-STO_r 3 <sup>rd</sup><br>comp | 5Cu-STO_r |
| Position                          | 933.3                           | 934.9                           | 944.0                           | 933.3                              | 934.9                              | 943.8                             | 932.2     |
| gamma                             | 0.61                            | 0.61                            | 0.61                            | 0.61                               | 0.61                               | 0.61                              | 0.61      |
| FWHM                              | 1.8                             | 2.3                             | 4.2                             | 1.65                               | 1.45                               | 4.2                               | 2.3       |

**Table S3:** Atomic ratios of the metal elements in STO and 5Cu-STO samples pristine and after reduction/re-oxidation process.

|       | STO       | STO_r     | 5Cu-STO   | 5Cu-STO_r | 5Cu-STO_ox |
|-------|-----------|-----------|-----------|-----------|------------|
| Sr/Ti | 0.9 ± 0.1 | 1.0 ± 0.1 | 0.9 ± 0.1 | 1.4 ± 0.1 | 1.3 ± 0.1  |

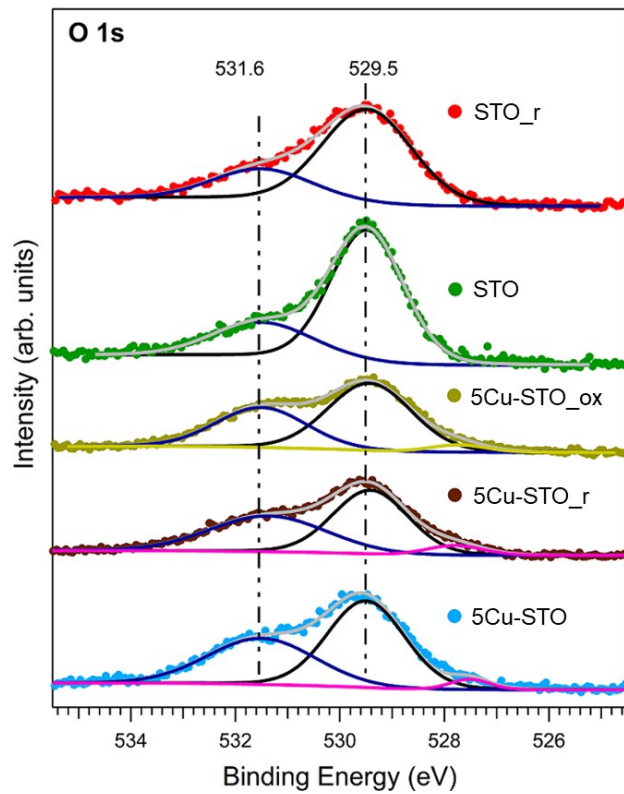

**Figure S4:** XPS core levels spectra of O1s for bare STO and Cu-STO samples.

### TEM analysis

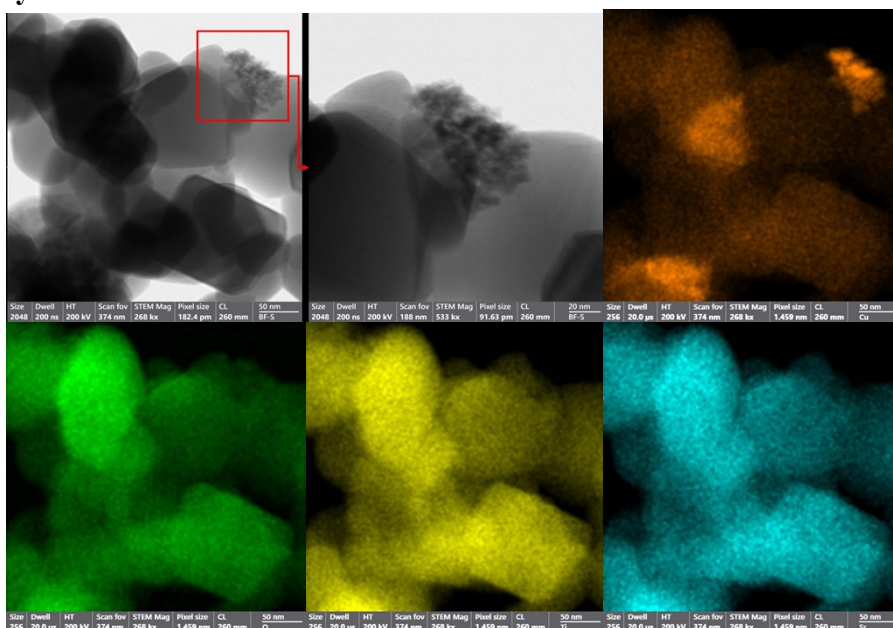

**Figure S5:** HR-TEM analysis of 0.5Cu-STO after reduction

## UV-DRS characterization

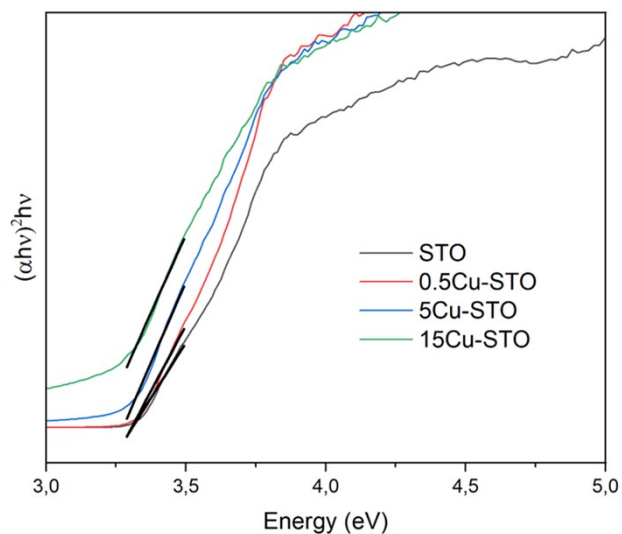

**Figure S6:** Tauc Plot for STO, 0.5Cu-STO, 5Cu-STO, 15Cu-STO

**Table S4:** Band gap energy calculated from Tauc plot.

| Sample        | STO  | 0.5Cu-STO | 5Cu-STO | 15Cu-STO |
|---------------|------|-----------|---------|----------|
| Band Gap (eV) | 3.31 | 3.30      | 3.27    | 3.19     |

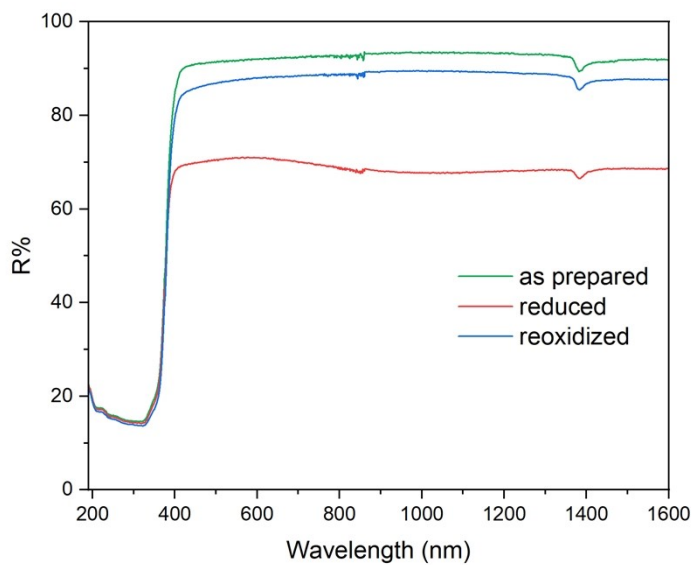

**Figure S7:** UV-DRS spectra of undoped STO presented in %R on the full measured range.
